# Supplementary material for: Efficacy of Cyclooctadepsipeptides and Aminophenylamidines against Larval, Immature and Mature Adult Stages of a Parasitologically Characterized Trichurosis Model in Mice
Source: PubMed Central journal article supplement (PMC3930511; doi:10.1371/journal.pntd.0002698), 2014-02-20
Supplement: pntd.0002698.s001.pdf [file pntd.0002698.s001.pdf]

**Supplementary Table S1** Localisation of *T. muris* stages throughout prepatency

| Day p.i. | Eggs     |          |          |               | Free larvae/adults |          |          |             | Histotropic larvae |           |             |          | Extruding larvae |            |             |          |
|----------|----------|----------|----------|---------------|--------------------|----------|----------|-------------|--------------------|-----------|-------------|----------|------------------|------------|-------------|----------|
|          | Duodenum | Colon    | Caecum   | Debris        | Duodenum           | Colon    | Caecum   | Debris      | Duodenum           | Colon     | Caecum      | Debris   | Duodenum         | Colon      | Caecum      | Debris   |
| 1        | 0, 0, 0; | 0, 0, 0; | 0, 0, 0; | 12, 3, 0;*    | 0, 0, 0;           | 0, 0, 0; | 0, 0, 0; | 27, 9, 2;   | 0, 0, 0;           | 8, 5, 2;  | 56, 47, 10; | 0, 0, 0; | 0, 0, 0;         | 0, 0, 0;   | 0, 0, 0;    | 0, 0, 0; |
| 2        | 0, 0, 0; | 0, 0, 0; | 0, 0, 0; | 5, 3, 2;*     | 0, 0, 0;           | 0, 0, 0; | 0, 0, 0; | 17, 14, 0;  | 0, 0, 0;           | 7, 0, 0;  | 88, 30, 22; | 0, 0, 0; | 0, 0, 0;         | 0, 0, 0;   | 0, 0, 0;    | 0, 0, 0; |
| 3        | 0, 0, 0; | 0, 0, 0; | 0, 0, 0; | 4, 3, 1;*     | 0, 0, 0;           | 0, 0, 0; | 0, 0, 0; | 20, 19, 11; | 0, 0, 0;           | 1, 0, 0;  | 13, 7, 0;   | 0, 0, 0; | 0, 0, 0;         | 0, 0, 0;   | 0, 0, 0;    | 0, 0, 0; |
| 4        | 0, 0, 0; | 0, 0, 0; | 0, 0, 0; | 1, 0, 0;*     | 0, 0, 0;           | 0, 0, 0; | 0, 0, 0; | 5, 4, 0;    | 0, 0, 0;           | 0, 0, 0;  | 9, 5, 5;    | 0, 0, 0; | 0, 0, 0;         | 0, 0, 0;   | 0, 0, 0;    | 0, 0, 0; |
| 5        | 0, 0, 0; | 0, 0, 0; | 0, 0, 0; | 0, 0, 0;      | 0, 0, 0;           | 0, 0, 0; | 0, 0, 0; | 3, 3, 1;    | 0, 0, 0;           | 0, 0, 0;  | 21, 12, 3;  | 0, 0, 0; | 0, 0, 0;         | 0, 0, 0;   | 0, 0, 0;    | 0, 0, 0; |
| 6        | 0, 0, 0; | 0, 0, 0; | 0, 0, 0; | 0, 0, 0;      | 0, 0, 0;           | 0, 0, 0; | 0, 0, 0; | 0, 0, 0;    | 0, 0, 0;           | 1, 0, 0;  | 9, 4, 2;    | 0, 0, 0; | 0, 0, 0;         | 0, 0, 0;   | 0, 0, 0;    | 0, 0, 0; |
| 7        | 0, 0, 0; | 0, 0, 0; | 0, 0, 0; | 0, 0, 0;      | 0, 0, 0;           | 0, 0, 0; | 0, 0, 0; | 0, 0, 0;    | 0, 0, 0;           | 2, 1, 0;  | 11, 7, 6;   | 0, 0, 0; | 0, 0, 0;         | 0, 0, 0;   | 0, 0, 0;    | 0, 0, 0; |
| 8        | 0, 0, 0; | 0, 0, 0; | 0, 0, 0; | 0, 0, 0;      | 0, 0, 0;           | 0, 0, 0; | 0, 0, 0; | 2, 0, 0;    | 0, 0, 0;           | 0, 0, 0;  | 18, 13, 2;  | 0, 0, 0; | 0, 0, 0;         | 0, 0, 0;   | 0, 0, 0;    | 0, 0, 0; |
| 9        | 0, 0, 0; | 0, 0, 0; | 0, 0, 0; | 0, 0, 0;      | 0, 0, 0;           | 0, 0, 0; | 0, 0, 0; | 0, 0, 0;    | 0, 0, 0;           | 3, 0, 0;  | 13, 12, 5;  | 0, 0, 0; | 0, 0, 0;         | 0, 0, 0;   | 0, 0, 0;    | 0, 0, 0; |
| 10       | 0, 0, 0; | 0, 0, 0; | 0, 0, 0; | 0, 0, 0;      | 0, 0, 0;           | 0, 0, 0; | 0, 0, 0; | 0, 0, 0;    | 0, 0, 0;           | 5, 4, 0;  | 19, 16, 15; | 0, 0, 0; | 0, 0, 0;         | 0, 0, 0;   | 0, 0, 0;    | 0, 0, 0; |
| 11       | 0, 0, 0; | 0, 0, 0; | 0, 0, 0; | 0, 0, 0;      | 0, 0, 0;           | 0, 0, 0; | 0, 0, 0; | 0, 0, 0;    | 0, 0, 0;           | 0, 0, 0;  | 14, 12, 2;  | 0, 0, 0; | 0, 0, 0;         | 0, 0, 0;   | 0, 0, 0;    | 0, 0, 0; |
| 12       | 0, 0, 0; | 0, 0, 0; | 0, 0, 0; | 0, 0, 0;      | 0, 0, 0;           | 0, 0, 0; | 0, 0, 0; | 0, 0, 0;    | 0, 0, 0;           | 0, 0, 0;  | 17, 10, 10; | 0, 0, 0; | 0, 0, 0;         | 0, 0, 0;   | 0, 0, 0;    | 0, 0, 0; |
| 13       | 0, 0, 0; | 0, 0, 0; | 0, 0, 0; | 0, 0, 0;      | 0, 0, 0;           | 0, 0, 0; | 0, 0, 0; | 0, 0, 0;    | 0, 0, 0;           | 0, 0, 0;  | 29, 26, 16; | 0, 0, 0; | 0, 0, 0;         | 0, 0, 0;   | 0, 0, 0;    | 0, 0, 0; |
| 14       | 0, 0, 0; | 0, 0, 0; | 0, 0, 0; | 0, 0, 0;      | 0, 0, 0;           | 0, 0, 0; | 0, 0, 0; | 0, 0, 0;    | 0, 0, 0;           | 1, 0, 0;  | 38, 24, 11; | 0, 0, 0; | 0, 0, 0;         | 0, 0, 0;   | 0, 0, 0;    | 0, 0, 0; |
| 15       | 0, 0, 0; | 0, 0, 0; | 0, 0, 0; | 0, 0, 0;      | 0, 0, 0;           | 0, 0, 0; | 0, 0, 0; | 0, 0, 0;    | 0, 0, 0;           | 0, 0, 0;  | 26, 20, 18; | 0, 0, 0; | 0, 0, 0;         | 0, 0, 0;   | 0, 0, 0;    | 0, 0, 0; |
| 16       | 0, 0, 0; | 0, 0, 0; | 0, 0, 0; | 0, 0, 0;      | 0, 0, 0;           | 0, 0, 0; | 0, 0, 0; | 0, 0, 0;    | 0, 0, 0;           | 8, 2, 0;  | 29, 25, 10; | 0, 0, 0; | 0, 0, 0;         | 0, 0, 0;   | 0, 0, 0;    | 0, 0, 0; |
| 17       | 0, 0, 0; | 0, 0, 0; | 0, 0, 0; | 0, 0, 0;      | 0, 0, 0;           | 0, 0, 0; | 0, 0, 0; | 0, 0, 0;    | 0, 0, 0;           | 2, 0, 0;  | 24, 15, 14; | 0, 0, 0; | 0, 0, 0;         | 0, 0, 0;   | 0, 0, 0;    | 0, 0, 0; |
| 18       | 0, 0, 0; | 0, 0, 0; | 0, 0, 0; | 0, 0, 0;      | 0, 0, 0;           | 0, 0, 0; | 0, 0, 0; | 0, 0, 0;    | 0, 0, 0;           | 4, 4, 1;  | 43, 31, 28; | 0, 0, 0; | 0, 0, 0;         | 0, 0, 0;   | 0, 0, 0;    | 0, 0, 0; |
| 19       | 0, 0, 0; | 0, 0, 0; | 0, 0, 0; | 0, 0, 0;      | 0, 0, 0;           | 0, 0, 0; | 0, 0, 0; | 0, 0, 0;    | 0, 0, 0;           | 11, 5, 0; | 59, 39, 37; | 0, 0, 0; | 0, 0, 0;         | 0, 0, 0;   | 0, 0, 0;    | 0, 0, 0; |
| 20       | 0, 0, 0; | 0, 0, 0; | 0, 0, 0; | 0, 0, 0;      | 0, 0, 0;           | 0, 0, 0; | 0, 0, 0; | 0, 0, 0;    | 0, 0, 0;           | 3, 1, 0;  | 47, 41, 9;  | 0, 0, 0; | 0, 0, 0;         | 0, 0, 0;   | 0, 0, 0;    | 0, 0, 0; |
| 21       | 0, 0, 0; | 0, 0, 0; | 0, 0, 0; | 0, 0, 0;      | 0, 0, 0;           | 0, 0, 0; | 0, 0, 0; | 0, 0, 0;    | 0, 0, 0;           | 0, 0, 0;  | 33, 30, 21; | 0, 0, 0; | 0, 0, 0;         | 0, 0, 0;   | 8, 2, 0;    | 0, 0, 0; |
| 22       | 0, 0, 0; | 0, 0, 0; | 0, 0, 0; | 0, 0, 0;      | 0, 0, 0;           | 0, 0, 0; | 0, 0, 0; | 0, 0, 0;    | 0, 0, 0;           | 0, 0, 0;  | 12, 3, 3;   | 0, 0, 0; | 0, 0, 0;         | 5, 2, 0;   | 17, 13, 3;  | 0, 0, 0; |
| 23       | 0, 0, 0; | 0, 0, 0; | 0, 0, 0; | 0, 0, 0;      | 0, 0, 0;           | 0, 0, 0; | 0, 0, 0; | 0, 0, 0;    | 0, 0, 0;           | 0, 0, 0;  | 13, 8, 7;   | 0, 0, 0; | 0, 0, 0;         | 1, 1, 0;   | 19, 12, 6;  | 0, 0, 0; |
| 24       | 0, 0, 0; | 0, 0, 0; | 0, 0, 0; | 0, 0, 0;      | 0, 0, 0;           | 0, 0, 0; | 0, 0, 0; | 0, 0, 0;    | 0, 0, 0;           | 0, 0, 0;  | 5, 0, 0;    | 0, 0, 0; | 0, 0, 0;         | 11, 0, 0;  | 54, 27, 4;  | 0, 0, 0; |
| 25       | 0, 0, 0; | 0, 0, 0; | 0, 0, 0; | 0, 0, 0;      | 0, 0, 0;           | 0, 0, 0; | 0, 0, 0; | 0, 0, 0;    | 0, 0, 0;           | 0, 0, 0;  | 5, 4, 0;    | 0, 0, 0; | 0, 0, 0;         | 8, 0, 0;   | 79, 40, 23; | 0, 0, 0; |
| 26       | 0, 0, 0; | 0, 0, 0; | 0, 0, 0; | 0, 0, 0;      | 0, 0, 0;           | 0, 0, 0; | 0, 0, 0; | 0, 0, 0;    | 0, 0, 0;           | 2, 0, 0;  | 1, 1, 0;    | 0, 0, 0; | 0, 0, 0;         | 9, 9, 1;   | 35, 29, 6;  | 0, 0, 0; |
| 27       | 0, 0, 0; | 0, 0, 0; | 0, 0, 0; | 0, 0, 0;      | 0, 0, 0;           | 0, 0, 0; | 0, 0, 0; | 9, 0, 0;    | 0, 0, 0;           | 0, 0, 0;  | 2, 1, 0;    | 0, 0, 0; | 0, 0, 0;         | 25, 3, 2;  | 62, 10, 8;  | 0, 0, 0; |
| 28       | 0, 0, 0; | 0, 0, 0; | 0, 0, 0; | 0, 0, 0;      | 0, 0, 0;           | 0, 0, 0; | 0, 0, 0; | 23, 0, 0;   | 0, 0, 0;           | 1, 0, 0;  | 0, 0, 0;    | 0, 0, 0; | 0, 0, 0;         | 17, 11, 0; | 36, 19, 1;  | 0, 0, 0; |
| 29       | 0, 0, 0; | 0, 0, 0; | 0, 0, 0; | 0, 0, 0;      | 0, 0, 0;           | 0, 0, 0; | 0, 0, 0; | 3, 2, 0;    | 0, 0, 0;           | 0, 0, 0;  | 3, 0, 0;    | 0, 0, 0; | 0, 0, 0;         | 22, 20, 5; | 98, 55, 5;  | 0, 0, 0; |
| 30       | 0, 0, 0; | 0, 0, 0; | 0, 0, 0; | 82, 0, 0; **  | 0, 0, 0;           | 0, 0, 0; | 0, 0, 0; | 6, 0, 0;    | 0, 0, 0;           | 0, 0, 0;  | 0, 0, 0;    | 0, 0, 0; | 0, 0, 0;         | 13, 10, 0; | 71, 38, 27; | 0, 0, 0; |
| 31       | 0, 0, 0; | 0, 0, 0; | 0, 0, 0; | 327, 0, 0; ** | 0, 0, 0;           | 0, 0, 0; | 0, 0, 0; | 5, 1, 1;    | 0, 0, 0;           | 0, 0, 0;  | 0, 0, 0;    | 0, 0, 0; | 0, 0, 0;         | 7, 5, 0;   | 54, 31, 23; | 0, 0, 0; |

Table shows localization of *T. muris* stages within their murine host in the course of prepatent period. Stages are subdivided into (i) eggs, (ii) larvae found in the intestinal contents (free larvae), (iii) larvae completely penetrated into the epithelium of duodenum, colon or caecum (histotropic larvae) and (iv) larvae extruding their posterior ends into the lumen of the guts (extruding larvae). Absolute numbers of stage counts per region are given for each mouse individually. \*, fully embryonated eggs; \*\*, unembryonated eggs;
