# Supplementary material for: Efficacy of Cyclooctadepsipeptides and Aminophenylamidines against Larval, Immature and Mature Adult Stages of a Parasitologically Characterized Trichurosis Model in Mice
Source: PubMed Central journal article supplement (PMC3930511; doi:10.1371/journal.pntd.0002698), 2014-02-20
Supplement: pntd.0002698.s002.pdf [file pntd.0002698.s002.pdf]

**Supplementary Table S2** Temperature dependency of *T. muris* larval development in eggs.

| DPP       | Unsegmented (in %) |      |      |      | Partially segmented (in %) |      |      |      | Fully developed (in %) |      |      |      | Degenerated (in %) |      |      |      |
|-----------|--------------------|------|------|------|----------------------------|------|------|------|------------------------|------|------|------|--------------------|------|------|------|
|           | 4°C                | 19°C | 27°C | 37°C | 4°C                        | 19°C | 27°C | 37°C | 4°C                    | 19°C | 27°C | 37°C | 4°C                | 19°C | 27°C | 37°C |
| <b>0</b>  | 100                | 100  | 100  | 100  | 0                          | 0    | 0    | 0    | 0                      | 0    | 0    | 0    | 0                  | 0    | 0    | 0    |
|           | 100                | 100  | 100  | 100  | 0                          | 0    | 0    | 0    | 0                      | 0    | 0    | 0    | 0                  | 0    | 0    | 0    |
|           | 100                | 100  | 100  | 100  | 0                          | 0    | 0    | 0    | 0                      | 0    | 0    | 0    | 0                  | 0    | 0    | 0    |
|           | 100                | 100  | 100  | 100  | 0                          | 0    | 0    | 0    | 0                      | 0    | 0    | 0    | 0                  | 0    | 0    | 0    |
|           | 100                | 100  | 100  | 100  | 0                          | 0    | 0    | 0    | 0                      | 0    | 0    | 0    | 0                  | 0    | 0    | 0    |
|           | 100                | 100  | 100  | 100  | 0                          | 0    | 0    | 0    | 0                      | 0    | 0    | 0    | 0                  | 0    | 0    | 0    |
| <b>7</b>  | 100                | 100  | 100  | 100  | 0                          | 0    | 0    | 0    | 0                      | 0    | 0    | 0    | 0                  | 0    | 0    | 0    |
|           | 100                | 100  | 100  | 100  | 0                          | 0    | 0    | 0    | 0                      | 0    | 0    | 0    | 0                  | 0    | 0    | 0    |
|           | 100                | 100  | 100  | 100  | 0                          | 0    | 0    | 0    | 0                      | 0    | 0    | 0    | 0                  | 0    | 0    | 0    |
|           | 100                | 100  | 100  | 100  | 0                          | 0    | 0    | 0    | 0                      | 0    | 0    | 0    | 0                  | 0    | 0    | 0    |
|           | 100                | 100  | 100  | 100  | 0                          | 0    | 0    | 0    | 0                      | 0    | 0    | 0    | 0                  | 0    | 0    | 0    |
|           | 100                | 100  | 100  | 100  | 0                          | 0    | 0    | 0    | 0                      | 0    | 0    | 0    | 0                  | 0    | 0    | 0    |
| <b>14</b> | 100                | 100  | 100  | 100  | 0                          | 0    | 0    | 0    | 0                      | 0    | 0    | 0    | 0                  | 0    | 0    | 0    |
|           | 100                | 100  | 100  | 100  | 0                          | 0    | 0    | 0    | 0                      | 0    | 0    | 0    | 0                  | 0    | 0    | 0    |
|           | 100                | 100  | 100  | 100  | 0                          | 0    | 0    | 0    | 0                      | 0    | 0    | 0    | 0                  | 0    | 0    | 0    |
|           | 100                | 100  | 100  | 96.0 | 0                          | 0    | 0    | 4.0  | 0                      | 0    | 0    | 0    | 0                  | 0    | 0    | 0    |
|           | 100                | 100  | 100  | 89.5 | 0                          | 0    | 0    | 10.5 | 0                      | 0    | 0    | 0    | 0                  | 0    | 0    | 0    |
|           | 100                | 100  | 94.7 | 75.0 | 0                          | 0    | 5.3  | 25.0 | 0                      | 0    | 0    | 0    | 0                  | 0    | 0    | 0    |
| <b>21</b> | 100                | 100  | 100  | 0    | 0                          | 0    | 100  | 0    | 0                      | 0    | 0    | 0    | 0                  | 0    | 0    | 0    |
|           | 100                | 100  | 95.0 | 10.5 | 0                          | 0    | 5.0  | 89.5 | 0                      | 0    | 0    | 0    | 0                  | 0    | 0    | 0    |
|           | 100                | 100  | 88.9 | 11.7 | 0                          | 0    | 11.1 | 88.3 | 0                      | 0    | 0    | 0    | 0                  | 0    | 0    | 0    |
|           | 100                | 100  | 86.9 | 15.8 | 0                          | 0    | 13.1 | 84.2 | 0                      | 0    | 0    | 0    | 0                  | 0    | 0    | 0    |
|           | 100                | 100  | 76.2 | 22.8 | 0                          | 0    | 23.8 | 77.2 | 0                      | 0    | 0    | 0    | 0                  | 0    | 0    | 0    |
|           | 100                | 86.4 | 68.4 | 33.3 | 0                          | 13.7 | 31.6 | 66.7 | 0                      | 0    | 0    | 0    | 0                  | 0    | 0    | 0    |
| <b>28</b> | 100                | 100  | 73.7 | 0    | 0                          | 0    | 26.3 | 100  | 0                      | 0    | 0    | 0    | 0                  | 0    | 0    | 0    |
|           | 100                | 100  | 68.4 | 0    | 0                          | 0    | 31.6 | 100  | 0                      | 0    | 0    | 0    | 0                  | 0    | 0    | 0    |
|           | 100                | 100  | 61.9 | 0    | 0                          | 0    | 38.1 | 100  | 0                      | 0    | 0    | 0    | 0                  | 0    | 0    | 0    |
|           | 100                | 69.6 | 48.0 | 0    | 0                          | 30.4 | 52.0 | 61.9 | 0                      | 0    | 0    | 0    | 0                  | 0    | 0    | 38.9 |
|           | 100                | 61.1 | 40.0 | 0    | 0                          | 38.9 | 60.0 | 57.1 | 0                      | 0    | 0    | 0    | 0                  | 0    | 0    | 42.9 |
|           | 100                | 55.2 | 36.8 | 0    | 0                          | 44.8 | 64.8 | 42.9 | 0                      | 0    | 0    | 9.5  | 0                  | 0    | 0    | 47.6 |
| <b>35</b> | 100                | 81.1 | 0    | 0    | 0                          | 18.9 | 100  | 5.0  | 0                      | 0    | 0    | 20.0 | 0                  | 0    | 0    | 75.0 |
|           | 100                | 76.5 | 0    | 0    | 0                          | 23.5 | 100  | 3.7  | 0                      | 0    | 0    | 25.9 | 0                  | 0    | 0    | 70.4 |

|           |     |      |     |   |   |      |      |   |   |   |      |      |   |   |     |      |
|-----------|-----|------|-----|---|---|------|------|---|---|---|------|------|---|---|-----|------|
|           | 100 | 73.3 | 0   | 0 | 0 | 26.7 | 95.7 | 0 | 0 | 0 | 0    | 44.0 | 0 | 0 | 4.3 | 66.0 |
|           | 100 | 26.9 | 7.4 | 0 | 0 | 73.1 | 92.6 | 0 | 0 | 0 | 0    | 82.1 | 0 | 0 | 0   | 17.9 |
|           | 100 | 26.7 | 5.3 | 0 | 0 | 73.3 | 94.7 | 0 | 0 | 0 | 0    | 71.4 | 0 | 0 | 0   | 28.6 |
|           | 100 | 5.9  | 4.4 | 0 | 0 | 94.1 | 95.6 | 0 | 0 | 0 | 0    | 87.5 | 0 | 0 | 0   | 12.5 |
| <b>42</b> | 100 | 78.9 | 0   | 0 | 0 | 21.1 | 73.3 | 0 | 0 | 0 | 26.7 | 73.3 | 0 | 0 | 0   | 26.7 |
|           | 100 | 78.6 | 0   | 0 | 0 | 21.4 | 72.7 | 0 | 0 | 0 | 27.3 | 76.2 | 0 | 0 | 0   | 23.8 |
|           | 100 | 80.0 | 0   | 0 | 0 | 20.0 | 70.0 | 0 | 0 | 0 | 30.0 | 72.7 | 0 | 0 | 0   | 27.3 |
|           | 100 | 0    | 0   | 0 | 0 | 100  | 52.9 | 0 | 0 | 0 | 47.1 | 35.7 | 0 | 0 | 0   | 64.3 |
|           | 100 | 0    | 0   | 0 | 0 | 100  | 41.2 | 0 | 0 | 0 | 58.8 | 35.3 | 0 | 0 | 0   | 64.7 |
|           | 100 | 0    | 0   | 0 | 0 | 100  | 35.7 | 0 | 0 | 0 | 64.3 | 12.5 | 0 | 0 | 0   | 87.5 |
| <b>49</b> | 100 | 54.2 | 0   | 0 | 0 | 45.8 | 42.9 | 0 | 0 | 0 | 57.1 | 0    | 0 | 0 | 0   | 0    |
|           | 100 | 41.4 | 0   | 0 | 0 | 58.6 | 36.4 | 0 | 0 | 0 | 63.6 | 0    | 0 | 0 | 0   | 0    |
|           | 100 | 38.9 | 0   | 0 | 0 | 61.1 | 35.0 | 0 | 0 | 0 | 65.0 | 0    | 0 | 0 | 0   | 0    |
|           | 100 | 0    | 0   | 0 | 0 | 100  | 14.3 | 0 | 0 | 0 | 85.7 | 0    | 0 | 0 | 0   | 0    |
|           | 100 | 0    | 0   | 0 | 0 | 100  | 11.8 | 0 | 0 | 0 | 88.2 | 0    | 0 | 0 | 0   | 0    |
|           | 100 | 0    | 0   | 0 | 0 | 100  | 10.0 | 0 | 0 | 0 | 90.0 | 0    | 0 | 0 | 0   | 0    |
| <b>56</b> | 100 | 0    | 0   | 0 | 0 | 100  | 0    | 0 | 0 | 0 | 100  | 0    | 0 | 0 | 0   | 0    |
|           | 100 | 0    | 0   | 0 | 0 | 100  | 0    | 0 | 0 | 0 | 100  | 0    | 0 | 0 | 0   | 0    |
|           | 100 | 0    | 0   | 0 | 0 | 100  | 0    | 0 | 0 | 0 | 100  | 0    | 0 | 0 | 0   | 0    |
|           | 100 | 42.1 | 0   | 0 | 0 | 57.9 | 0    | 0 | 0 | 0 | 100  | 0    | 0 | 0 | 0   | 0    |
|           | 100 | 40.9 | 0   | 0 | 0 | 59.1 | 0    | 0 | 0 | 0 | 96.6 | 0    | 0 | 0 | 4.4 | 0    |
|           | 100 | 33.3 | 0   | 0 | 0 | 66.7 | 0    | 0 | 0 | 0 | 94.7 | 0    | 0 | 0 | 5.3 | 0    |
| <b>63</b> | 100 | 0    | 0   | 0 | 0 | 100  | 0    | 0 | 0 | 0 | 0    | 0    | 0 | 0 | 0   | 0    |
|           | 100 | 0    | 0   | 0 | 0 | 100  | 0    | 0 | 0 | 0 | 0    | 0    | 0 | 0 | 0   | 0    |
|           | 100 | 0    | 0   | 0 | 0 | 100  | 0    | 0 | 0 | 0 | 0    | 0    | 0 | 0 | 0   | 0    |
|           | 100 | 0    | 0   | 0 | 0 | 100  | 0    | 0 | 0 | 0 | 0    | 0    | 0 | 0 | 0   | 0    |
|           | 100 | 0    | 0   | 0 | 0 | 100  | 0    | 0 | 0 | 0 | 0    | 0    | 0 | 0 | 0   | 0    |
|           | 100 | 10.5 | 0   | 0 | 0 | 89.5 | 0    | 0 | 0 | 0 | 0    | 0    | 0 | 0 | 0   | 0    |
| <b>70</b> | 100 | 0    | 0   | 0 | 0 | 100  | 0    | 0 | 0 | 0 | 0    | 0    | 0 | 0 | 0   | 0    |
|           | 100 | 0    | 0   | 0 | 0 | 100  | 0    | 0 | 0 | 0 | 0    | 0    | 0 | 0 | 0   | 0    |
|           | 100 | 0    | 0   | 0 | 0 | 100  | 0    | 0 | 0 | 0 | 0    | 0    | 0 | 0 | 0   | 0    |
|           | 100 | 0    | 0   | 0 | 0 | 100  | 0    | 0 | 0 | 0 | 0    | 0    | 0 | 0 | 0   | 0    |
|           | 100 | 4.5  | 0   | 0 | 0 | 95.5 | 0    | 0 | 0 | 0 | 0    | 0    | 0 | 0 | 0   | 0    |
|           | 100 | 5.9  | 0   | 0 | 0 | 94.1 | 0    | 0 | 0 | 0 | 0    | 0    | 0 | 0 | 0   | 0    |

DPI: Days post purification.
