# Supplementary material for: Efficacy of Cyclooctadepsipeptides and Aminophenylamidines against Larval, Immature and Mature Adult Stages of a Parasitologically Characterized Trichurosis Model in Mice
Source: PubMed Central journal article supplement (PMC3930511; doi:10.1371/journal.pntd.0002698), 2014-02-20
Supplement: pntd.0002698.s003.pdf [file pntd.0002698.s003.pdf]

**Supplementary Table S3: Descriptive statistics for each treatment group (classified by individual drugs, dose regimen and route of administration)**

**dAMD, three oral doses**

|             | <b>Control</b> | <b>1.0 mg/kg</b> | <b>5.0 mg/kg</b> | <b>10 mg/kg</b> | <b>25 mg/kg</b> | <b>50 mg/kg</b> | <b>100 mg/kg</b> |
|-------------|----------------|------------------|------------------|-----------------|-----------------|-----------------|------------------|
| <b>Mean</b> | 32.97          | 46.80            | 56.00            | 23.60           | 11.20           | 2.33            | 0                |
| <b>SD</b>   | 13.66          | 12.03            | 16.93            | 15.95           | 9.83            | 3.83            | 0                |
| <b>N</b>    | 89             | 5                | 5                | 5               | 5               | 5               | 5                |

**dAMD, three intraperitoneal doses**

|             | <b>Control</b> | <b>5.0 mg/kg</b> | <b>10 mg/kg</b> | <b>25 mg/kg</b> | <b>50 mg/kg</b> | <b>100 mg/kg</b> |
|-------------|----------------|------------------|-----------------|-----------------|-----------------|------------------|
| <b>Mean</b> | 32.97          | 36.20            | 9.40            | 3.40            | 0               | 0                |
| <b>SD</b>   | 13.66          | 14.45            | 5.98            | 5.41            | 0               | 0                |
| <b>N</b>    | 89             | 5                | 5               | 5               | 5               | 5                |

**Tribendimidine, three oral doses**

|             | <b>Control</b> | <b>1.0 mg/kg</b> | <b>5.0 mg/kg</b> | <b>10 mg/kg</b> | <b>25 mg/kg</b> | <b>50 mg/kg</b> | <b>100 mg/kg</b> |
|-------------|----------------|------------------|------------------|-----------------|-----------------|-----------------|------------------|
| <b>Mean</b> | 32.97          | 59.20            | 35.00            | 5.80            | 0               | 0               | 0                |
| <b>SD</b>   | 13.66          | 22.00            | 9.03             | 5.72            | 0               | 0               | 0                |
| <b>N</b>    | 89             | 5                | 5                | 5               | 5               | 5               | 5                |

**Tribendimidine, three intraperitoneal doses**

|             | <b>Control</b> | <b>5.0 mg/kg</b> | <b>10 mg/kg</b> | <b>25 mg/kg</b> | <b>50 mg/kg</b> | <b>100 mg/kg</b> |
|-------------|----------------|------------------|-----------------|-----------------|-----------------|------------------|
| <b>Mean</b> | 32.97          | 36.80            | 27.60           | 8.80            | 0               | 0                |
| <b>SD</b>   | 13.66          | 14.03            | 6.62            | 7.85            | 0               | 0                |
| <b>N</b>    | 89             | 5                | 5               | 5               | 5               | 5                |
